# Supplementary material
Source: PubMed Central journal article supplement (PMC3039515)
Supplement: ejhg2010154x1.pdf [file ejhg2010154x1.pdf]

## REFERENCES FOR SUPPLEMENTARY TABLE S1

- Álvarez, S., Mesa, M.S., López, A.M., de las Heras, J., de Lago, E., López, M.T., Rubio, J.M., Arroyo-Pardo, E., 2002. STR data for nine Y-chromosomal loci in Guinea Equatorial (Central Africa). *Forensic Sci. Int.* 127, 142–144.
- Alves, C., Gomes, V., Prata, M.J., Amorim, A., Gusmão, L., 2007. Population data for Y-chromosome haplotypes defined by 17 STRs (AmpFISTR Yfiler) in Portugal. *Forensic Sci. Int.* 171, 250–255.
- Alves, C., Gusmão, L., Barbosa, J., Amorim, A., 2003. Evaluating the informative power of Y-STRs: a comparative study using European and new African haplotype data. *Forensic Sci. Int.* 134, 126–133.
- Arroyo-Pardo, E., Gusmão, L., López-Parra, A.M., Baeza, C., Mesa, M.S., Amorim, A., 2005. Genetic variability of 16 Y-chromosome STRs in a sample from Equatorial Guinea (Central Africa). *Forensic Sci. Int.* 149, 109–113.
- Ayadi, I., Ammar-Keskes, L., Rebai, A., 2006. Haplotypes for 13 Y-chromosomal STR loci in South Tunisian population (Sfax region). *Forensic Sci. Int.* 164, 249–253.
- Baeza, C., Guzmán, R., Tirado, M., López-Parra, A.M., Rodríguez, T., Mesa, M.S., Fernández, E., Arroyo-Pardo, E., 2007. Population data for 15 Y-chromosome STRs in a population sample from Quito (Ecuador). *Forensic Sci. Int.* 173, 214–219.
- Ballard, D.J., Phillips, C., Thacker, C.R., Syndercombe Court, D., 2006. Y chromosome STR haplotype data for an Irish population. *Forensic Sci. Int.* 161, 64–68.
- Barač, L., Peričić, M., Martinović Klarić, I., Janičijević, B., Parik, J., Rootsi, S., Rudan, P., 2003. Y chromosome STRs in Croatians. *Forensic Sci. Int.* 138, 127–133.
- Barrot, C., Simili, C., Sánchez, C., Brandt-Casadevall, C., González-Martín, A., Xifró, A., Ortega, M., Huguet, E., Corbella, J., Gené, M., 2007. Haplotype frequencies of eight Y-chromosome short tandem repeats loci in four Amerindian populations (State of Hidalgo, Mexico). *Journal of Forensic Sciences* 52, 504–506.
- Berger, B., Lindinger, A., Niederstätter, H., Grubwieser, P., Parson, W., 2005. Y-STR typing of an Austrian population sample using a 17-loci multiplex PCR assay. *Int. J. Legal Med.* 119, 241–246.
- Berger, B., Niederstätter, H., Brandstätter, A., Parson, W., 2003. Molecular characterization and Austrian Caucasian population data of the multi-copy Y-chromosomal STR DYS464. *Forensic Sci. Int.* 137, 221–230.
- Bianchi, N.O., Catanesi, C.I., Bailliet, G., Martinez-Marignac, V.L., Bravi, C.M., Vidal-Rioja, L.B., Herrera, R.J., López-Camelo, J.S., 1998. Characterization of ancestral and derived Y-chromosome haplotypes of New World native populations. *Am. J. Hum. Genet.* 63, 1862–1871.
- Bortolini, M., Salzano, F.M., Thomas, M.G., Stuart, S., Nasanen, S.P., Bau, C.H., Hutz, M.H., Layrisse, Z., Petzl-Erler, M.L., Tsuneto, L.T., Hill, K., Hurtado, A.M., Castro-de-Guerra, D., Torres, M.M., Groot, H., Michalski, R., Nymadawa, P., Bedoya, G., Bradman, N., Labuda, D., Ruiz-Linares, A., 2003. Y-chromosome evidence for differing ancient demographic histories in the Americas. *The American Journal of Human Genetics* 73, 524–539.
- Bosch, E., Calafell, F., Pérez-Lezaun, A., Comas, D., Izaabel, H., Akhayat, O., Sefiani, A., Hariti, G., Dugoujon, J.M., Bertranpetit, J., 2000. Y chromosome STR haplotypes in four populations from northwest Africa. *Int. J. Legal Med.* 114, 36–40.

- Bosch, E., Rosser, Z.H., Nørby, S., Lynnerup, N., Jobling, M.A., 2003. Y-chromosomal STR haplotypes in Inuit and Danish population samples. *Forensic Sci. Int.* 132, 228–232.
- Brandt-Casadevall, C., Ben Dhiab, M., Taroni, F., Castella, V., Dimo-Simonin, N., Zemni, M., Mangin, P., 2003. Tunisian population data on 10 Y-chromosomal loci. *Forensic Sci. Int.* 135, 247–250.
- Builes, J.J., Martínez, B., Gómez, A., Caraballo, L., Espinal, C., Aguirre, D., Montoya, A., Moreno, M., Amorim, A., Gusmão, L., Bravo, M.L., 2007. Y chromosome STR haplotypes in the Caribbean city of Cartagena (Colombia). *Forensic Sci. Int.* 167, 62–69.
- Butler, J.M., Decker, A.E., Vallone, P.M., Kline, M.C., 2006. Allele frequencies for 27 Y-STR loci with U.S. Caucasian, African American, and Hispanic samples. *Forensic Sci. Int.* 156, 250–260.
- Caglià, A., Tofanelli, S., Coia, V., Boschi, I., Pescarmona, M., Spedini, G., Pascali, V., Paoli, G., Destro-Bisol, G., 2003. A study of Y-chromosome microsatellite variation in Sub-Saharan Africa: a comparison between Fst and Rst genetic distances. *Hum. Biol.* 75, 313–330.
- Çakır, A.H., Çelebioğlu, A., Yardımcı, E., 2004. Y-STR haplotypes in Central Anatolia region of Turkey. *Forensic Sci. Int.* 144, 59–64.
- Carvalho, M., Anjos, M.A., Andrade, L., Lopes, V., Santos, M.V., Gamero, J., Corte Real, F., Vide, M.A., 2003. Y-chromosome STR haplotypes in two population samples: Azores Islands and Central Portugal. *Forensic Sci. Int.* 134, 29–35.
- Chang, Y.M., Perumal, R., Keat, P.Y., Kuehn, D.L.C., 2007. Haplotype diversity of 16 Y-chromosomal STRs in three main ethnic populations (Malays, Chinese and Indians) in Malaysia. *Forensic Sci. Int.* 167, 70–76.
- Cherni, L., Pereira, L., Goios, A., Loueslati, B.Y., Khil, H.K.E., Gomes, I., Gusmão, L., Alves, C., Slama, A., Amorim, A., Elgaaied, A.B., 2005. Y-chromosomal STR haplotypes in three ethnic groups and one cosmopolitan population from Tunisia. *Forensic Sci. Int.* 152, 95–99.
- Coia, V., Caglià, A., Arredi, B., Donati, F., Santos, F.R., Pandya, A., Taglioli, L., Paoli, G., Pascali, V., Destro-Bisol, G., Tyler-Smith, C., 2004. Binary and microsatellite polymorphisms of the Y-chromosome in the Mbenzele pygmies from the Central African Republic. *Am. J. Hum. Biol.* 16, 57–67.
- Dai, H.L., Wang, X.D., Li, Y.B., Wu, J., Zhang, J., Zhang, H.J., Dong, J.G., Hou, Y.P., 2004. Characterization and haplotype analysis of 10 novel Y-STR loci in Chinese Han population. *Forensic Sci. Int.* 145, 47–55.
- De Maesschalck, K., Vanhoutte, E., Knaepen, K., Vanderheyden, N., Cassiman, J., Decorte, R., 2005. Y-chromosomal STR haplotypes in a Belgian population sample and identification of a micro-variant with a flanking site mutation at DYS19. *Forensic Sci. Int.* 152, 89–94.
- Decker, A.E., Kline, M.C., Redman, J.W., Reid, T.M., Butler, J.M., 2008. Analysis of mutations in father–son pairs with 17 Y-STR loci. *Forensic Sci. Int.: Genet.* 2, e31–e35.
- Derenko, M., Malyarchuk, B., Denisova, G., Wozniak, M., Grzybowski, T., Dambueva, I., Zakharov, I., 2007. Y-chromosome haplogroup N dispersals from south Siberia to Europe. *J. Hum. Genet.* 52, 763–770.
- Destro-Bisol, G., Donati, F., Coia, V., Boschi, I., Verginelli, F., Caglià, A., Tofanelli, S., Spedini, G., Capelli, C., 2004. Variation of female and male lineages in Sub-Saharan populations: the importance of sociocultural factors. *Mol. Biol. Evol.* 21, 1673–1682.

- Forster, P., Kayser, M., Meyer, E., Roewer, L., Pfeiffer, H., Benkmann, H., Brinkmann, B., 1998. Phylogenetic resolution of complex mutational features at Y-STR DYS390 in aboriginal Australians and Papuans. *Mol. Biol. Evol.* 15, 1108–1114.
- Frigi, S., Pereira, F., Pereira, L., Yacoubi, B., Gusmão, L., Alves, C., Khodjet el Khil, H., Cherni, L., Amorim, A., Gaaied, A.E., 2006. Data for Y-chromosome haplotypes defined by 17 STRs (AmpFLSTR® Yfiler™) in two Tunisian Berber communities. *Forensic Science International* 160, 80–83.
- Fujihara, J., Takeshita, H., Tsubota, E., Iida, R., 2009. Allele frequencies and haplotypes for five Y-STRs (DYS441, DYS442, DYS443, DYS444, and DYS445) in Ovambo and Turks populations using multiplex PCR system. *Forensic Science International: Genetics* 3, 268–269.
- García, O., Martín, P., Gusmão, L., Albarrán, C., Alonso, S., de la Rúa, C., Flores, C., Izagirre, N., Peñas, R., Pérez, J.A., Uriarte, I., Yurrebaso, I., Alonso, A., 2004. A Basque Country autochthonous population study of 11 Y-chromosome STR loci. *Forensic Science International* 145, 65–68.
- Hallenberg, C., Simonsen, B., Sanchez, J., Morling, N., 2005. Y-chromosome STR haplotypes in Somalis. *Forensic Science International* 151, 317–321.
- Hashiyada, M., Umetsu, K., Yuasa, I., Tamura, A., Matsusue, A., Suzuki, K., Kashimura, S., Funayama, M., 2008. Population genetics of 17 Y-chromosomal STR loci in Japanese. *Forensic Science International: Genetics* 2, e69–e70.
- Hu, S.P., 2006. Polymorphism of Y-chromosomal STR haplotypes in the Chaoshan Han Chinese in South China. *Forensic Sci. Int.* 158, 80–85.
- Huang, T., Hsu, Y., Li, J., Chung, J., Shun, C., 2008. Polymorphism of 17 Y-STR loci in Taiwan population. *Forensic Science International* 174, 249–254.
- Hwang, J.H., Lee, H., Lee, Y.A., Han, M.S., Kim, W., Jin, I., Cho, N.S., 2007. Haplotypes for 12 Y-chromosomal STR loci in a Korean population (the central region). *Forensic Science International* 168, 73–84.
- Iida, R., Tsubota, E., Sawazaki, K., Masuyama, M., Matsuki, T., Yasuda, T., Kishi, K., 2002. Characterization and haplotype analysis of the polymorphic Y-STRs DYS443, DYS444 and DYS445 in a Japanese population. *International Journal of Legal Medicine* 116, 191–194.
- Järve, M., Zhivotovsky, L.A., Rootsi, S., Help, H., Rogaev, E.I., Khusnutdinova, E.K., Kivisild, T., Sanchez, J.J., 2009. Decreased Rate of Evolution in Y Chromosome STR Loci of Increased Size of the Repeat Unit. *PLoS ONE* 4, e7276.
- Kayser, M., Krawczak, M., Excoffier, L., Dieltjes, P., Corach, D., Pascali, V., Gehrig, C., Bernini, L.F., Jespersen, J., Bakker, E., Roewer, L., Knijff, P.D., 2001. An extensive analysis of Y-chromosomal microsatellite haplotypes in globally dispersed human populations. *Am. J. Hum. Genet.* 68, 990–1018.
- Khodjet el Khil, H., Marrakchi, R.T., Loueslati, B.Y., Langaney, A., Fellous, M., BenAmmar Elgaaied, A., 2005. Distribution of Y chromosome lineages in Jerba island population. *Forensic Science International* 148, 211–218.
- Kim, S.H., Kim, N.Y., Hong, S.B., Cho, N.S., Kim, J.J., Han, M.S., Kim, W., 2008. Genetic polymorphisms of 16 Y chromosomal STR loci in Korean population. *Forensic Science International: Genetics* 2, e9–e10.

- Kim, S.H., Kim, N.Y., Kim, K.S., Kim, J.J., Park, J.T., Chung, K.W., Han, M.S., Kim, W., 2009. Population genetics and mutational events at 6 Y-STRs in Korean population. *Forensic Science International: Genetics* 3, e53–e54.
- Kumagai, R., Kumagai, A., Saigusa, K., Aoki, Y., 2007. Haplotype analysis of 17 Y-STR loci in a Japanese population. *Forensic Sci. Int.* 172, 72–78.
- Leat, N., Ehrenreich, L., Benjeddou, M., Cloete, K., Davison, S., 2007. Properties of novel and widely studied Y-STR loci in three South African populations. *Forensic Sci. Int.* 168, 154–161.
- Lecerf, M., Filali, M., Grésenguet, G., Ndjoyi-Mbiguino, A., Le Goff, J., de Mazancourt, P., Bélec, L., 2007. Allele frequencies and haplotypes of eight Y-short tandem repeats in Bantu population living in Central Africa. *Forensic Science International* 171, 212–215.
- Lee, H.Y., Oh, J., Han, G., Shin, K., 2003. Allele frequencies and haplotypes of six new Y-specific STR loci in Koreans. *Forensic Science International* 136, 89–91.
- Lee, H.Y., Park, M.J., Chung, U., Lee, H.Y., Yang, W.I., Cho, S., Shin, K., 2007. Haplotypes and mutation analysis of 22 Y-chromosomal STRs in Korean father—son pairs. *Int. J. Legal Med.* 121, 128–135.
- Lessig, R., Edelmann, J., Kleemann, W.J., Kozhemyako, V., 2006. Population data of Y-chromosomal STRs in Russian males of the Primorye region population. *Forensic Science International* 159, 71–76.
- Li, K.L., Kai, L., Yuming, M., 2007. Y chromosome STR haplotypes of Tibetan living Tibet Lassa. *Forensic Science International* 172, 79–83.
- Lim, S., Xue, Y., Parkin, E., Tyler-Smith, C., 2007. Variation of 52 new Y-STR loci in the Y Chromosome Consortium worldwide panel of 76 diverse individuals. *Int. J. Legal Med.* 121, 124–127.
- López, A.M., Álvarez, S., Gusmão, L., Alves, C., Mesa, M.S., Albentosa, A., Arribas, G., López, R., Barrio, P.A., Amorim, A., Arroyo-Pardo, E., 2004. Population data for 16 Y-chromosome STRs in four populations from Pyrenees (Spain). *Forensic Science International* 140, 125–129.
- Martín, P., García-Hirschfeld, J., García, O., Gusmão, L., García, P., Albarrán, C., Sancho, M., Alonso, A., 2004. A Spanish population study of 17 Y-chromosome STR loci. *Forensic Science International* 139, 231–235.
- Mizuno, N., Nakahara, H., Sekiguchi, K., Yoshida, K., Nakano, M., Kasai, K., 2008. 16 Y chromosomal STR haplotypes in Japanese. *Forensic Science International* 174, 71–76.
- Nasidze, I., Schädlich, H., Stoneking, M., 2003. Haplotypes from the Caucasus, Turkey and Iran for nine Y-STR loci. *Forensic Science International* 137, 85–93.
- Ogata, Y., Yamaba, T., Sawazaki, K., Iida, R., Tsubota, E., Takatsuka, H., Matsuki, T., Yasuda, T., Kishi, K., 2005. Improvement of a multiplex PCR system for DYS441, DYS442, DYS443, DYS444 and DYS445, and a population study in 340 Japanese males. *Legal Medicine* 7, 183–189.
- Páez-Riberos, L.A., Muñoz-Valle, J.F., Figuera, L.E., Nuño-Arana, I., Sandoval-Ramírez, L., González-Martín, A., Ibarra, B., Rangel-Villalobos, H., 2006. Y-linked haplotypes in Amerindian chromosomes from Mexican populations: Genetic evidence to the dual origin of the Huichol tribe. *Legal Medicine* 8, 220–225.
- Park, M.J., Lee, H.Y., Yoo, J., Chung, U., Lee, S.Y., Shin, K., 2005. Forensic evaluation and haplotypes of 19 Y-chromosomal STR loci in Koreans. *Forensic Science International* 152, 133–147.

- Pereira, L., Gusmão, L., Alves, C., Amorim, A., Prata, M.J., 2002. Bantu and European Y-lineages in Sub-Saharan Africa. *Annals of Human Genetics* 66, 369–378.
- Pereira, R.W., Monteiro, E.H.G., Hirschfeld, G.C.R., Wang, A.Y., Grattapaglia, D., 2007. Haplotype diversity of 17 Y-chromosome STRs in Brazilians. *Forensic Science International* 171, 226–236.
- Pérez-Lezaun, A., Calafell, F., Comas, D., Mateu, E., Bosch, E., Martínez-Arias, R., Clarimón, J., Fiori, G., Luiselli, D., Facchini, F., Pettener, D., Bertranpetit, J., 1999. Sex-specific migration patterns in Central Asian populations, revealed by analysis of Y-chromosome short tandem repeats and mtDNA. *American Journal Human Genetics* 65, 208–219.
- Pokupčić, K., Cukrov, S., Klarić, I.M., Salihović, M.P., Lauc, L.B., Blažanović, A., Jančićević, B., 2008. Y-STR genetic diversity of Croatian (Bayash) Roma. *Forensic Sci. Int.: Genet.* 2, e11–e13.
- Pontes, M.L., Caine, L., Abrantes, D., Lima, G., Pinheiro, M.F., 2007. Allele frequencies and population data for 17 Y-STR loci (AmpF $\Phi$ STR<sup>®</sup> Y-filer<sup>™</sup>) in a Northern Portuguese population sample. *Forensic Sci. Int.* 170, 62–67.
- Quintana-Murci, L., Bigham, A., Rouba, H., Barakat, A., McElreavey, K., Hammer, M., 2004. Y-chromosomal STR haplotypes in Berber and Arabic-speaking populations from Morocco. *Forensic Sci. Int.* 140, 113–115.
- Quintans, B., Belez, S., Brion, M., Sanchez-Diz, P., Lareu, M., Carracedo, A., 2003. Population data of Galicia (NW Spain) on the new Y-STRs DYS437, DYS438, DYS439, GATA A10, GATA A7.1, GATA A7.2, GATA C4 and GATA H4. *Forensic Sci. Int.* 131, 220–224.
- Rodig, H., Roewer, L., Gross, A., Richter, T., de Knijff, P., Kayser, M., Brabetz, W., 2008. Evaluation of haplotype discrimination capacity of 35 Y-chromosomal short tandem repeat loci. *Forensic Science International* 174, 182–188.
- Romero, R.E., Briceño, I., Lizarazo, R.D.P., Willuweit, S., Roewer, L., Gómez, A., 2008. A Colombian Caribbean population study of 16 Y-chromosome STR loci. *Forensic Science International: Genetics* 2, e5–e8.
- Rosa, A., Ornelas, C., Jobling, M., Brehm, A., Villems, R., 2007. Y-chromosomal diversity in the population of Guinea-Bissau: a multiethnic perspective. *BMC Evolutionary Biology* 7, 124.
- Sánchez, C., Barrot, C., Xifró, A., Ortega, M., Gómez de Aranda, I., Huguet, E., Corbella, J., Gené, M., 2007. Haplotype frequencies of 16 Y-chromosome STR loci in the Barcelona metropolitan area population using Y-Filer<sup>™</sup> kit. *Forensic Science International* 172, 211–217.
- Schoske, R., Vallone, P.M., Kline, M.C., Redman, J.W., Butler, J.M., 2004. High-throughput Y-STR typing of U.S. populations with 27 regions of the Y chromosome using two multiplex PCR assays. *Forensic Sci. Int.* 139, 107–121.
- Shen, C., Li, S., 2005. Seven new Y-STRs haplotypes of Chinese Han ethnic group. *Forensic Science International* 154, 81–84.
- Shepherd, C., Harbison, S., Vintiner, J., 2004. Y STR haplotype data for New Zealand population groups using the Y-Plex<sup>™</sup> 6 kit. *Forensic Science International* 145, 69–72.
- Shi, M., Tang, J., Bai, R., Yu, X., Lv, J., Hu, B., 2007. Haplotypes of 20 Y-chromosomal STRs in a population sample from southeast China (Chaoshan area). *Int. J. Legal Med.* 121, 455–462.

- Shi, M., Bai, R., Yu, X., Lv, J., Hu, B., 2009. Haplotype diversity of 22 Y-chromosomal STRs in a southeast China population sample (Chaoshan area). *Forensic Science International: Genetics* 3, e45–e47.
- Soltyszewski, I., Pepinski, W., Spolnicka, M., Kartasinska, E., Konarzewska, M., Janica, J., 2007. Y-chromosomal haplotypes for the AmpFISTR Yfiler PCR Amplification Kit in a population sample from Central Poland. *Forensic Science International* 168, 61–67.
- Souto, L., Gusmão, L., Ferreira, E., Amorim, A., Côrte-Real, F., Vieira, D., 2006. Y-chromosome STR haplotypes in East Timor: Forensic evaluation and population data. *Forensic Science International* 156, 261–265.
- de Souza Góes, A.C., de Carvalho, E.F., Gomes, I., da Silva, D.A., Gil, É.H.F., Amorim, A., Gusmão, L., 2005. Population and mutation analysis of 17 Y-STR loci from Rio de Janeiro (Brazil). *Int. J. Legal Med.* 119, 70–76.
- Tang, J., Hou, Y., Li, Y., Wu, J., Zhang, J., Zhang, H., 2003. Characterization of eight Y-STR loci and haplotypes in a Chinese Han population. *Int. J. Legal Med.* 117, 263–270.
- Thangaraj, K., Singh, L., Reddy, A.G., Rao, V.R., Sehgal, S.C., Underhill, P.A., Pierson, M., Frame, I.G., Hagelberg, E., 2003. Genetic Affinities of the Andaman Islanders, a Vanishing Human Population. *Current Biology* 13, 86–93.
- Trovoada, M.J., Alves, C., Gusmão, L., Amorim, A., Prata, M.J., 2001. Evidence for population substructuring in São Tomé e Príncipe as inferred from Y-chromosome STR analysis. *Annals of Human Genetics* 65, 271–283.
- Turrina, S., Atzei, R., De Leo, D., 2006. Y-chromosomal STR haplotypes in a Northeast Italian population sample using 17plex loci PCR assay. *International Journal of Legal Medicine* 120, 56–59.
- Vandenberg, N., van Oorschot, R.A., Tyler-Smith, C., Mitchell, R.J., 1999. Y-chromosome-specific microsatellite variation in Australian aboriginals. *Human Biology* 71, 915–931.
- Veselinovic, I.S., Zgonjanin, D.M., Maletin, M.P., Stojkovic, O., Djurendic-Brenesel, M., Vukovic, R.M., Tasic, M.M., 2008. Allele frequencies and population data for 17 Y-chromosome STR loci in a Serbian population sample from Vojvodina province. *Forensic Science International* 176, 23–28.
- Vidal-Martinez, J., Benítez-Páez, A., Reyes, H.O., 2003. Population data of new Y-chromosome STRs GATA C4, DYS438, DYS437, GATA A7.2, GATA H4, DYS439 and GATA A10 in males from Colombia. *Forensic Science International* 135, 243–246.
- Woźniak, M., Derenko, M., Malyarchuk, B., Dambueva, I., Grzybowski, T., Miścicka-Śliwka, D., 2006. Allelic and haplotypic frequencies at 11 Y-STR loci in Buryats from South-East Siberia. *Forensic Science International* 164, 271–275.
- Xin, N., Chen, T., Yu, B., Li, S., 2008. 12 Y-STRs haplotypes in Chinese Naxi ethnic minority group. *Forensic Science International* 174, 244–248.
- Zhang, D., Zhang, D., Wu, W., Luo, H., Ye, Y., Feng, Y., Hou, Y., 2009. Haplotypes of six miniY-STR loci in the Han population from Sichuan province and the Zhuang population in Guangxi Zhuang autonomous region. *Forensic Science International: Genetics* 3, e49–e51.
- Zhang, H., Yun, L., Li, Y., Zhang, J., Wu, J., Yan, J., Hou, Y., 2008. Haplotype of 12 Y-STR loci of the PowerPlex Y-system in Sichuan Han ethnic group in west China. *Forensic Science International* 175, 244–249.

Zhang, Y., Cui, H., Cui, Y., Lin, H., Kim, K., Lee, J., 2006. Y chromosomal STR haplotypes in the northeastern China Han population. *Forensic Science International* 156, 82–87.

Zhang, Y., Lee, J., 2007. Genetic polymorphism of Y-chromosomal STR loci in South Korean population. *Forensic Science International* 173, 225–230.

Zhu, B., Li, X., Wang, Z., Wu, H., He, Y., Zhao, J., Liu, Y., 2005. Y-STRs haplotypes of Chinese Mongol ethnic group using Y-PLEX™ 12. *Forensic Science International* 153, 260–263.

Zhu, B., Wu, Y., Shen, C., Yang, T., Deng, Y., Xun, X., Tian, Y., Yan, J., Li, T., 2008. Genetic analysis of 17 Y-chromosomal STRs haplotypes of Chinese Tibetan ethnic group residing in Qinghai province of China. *Forensic Science International* 175, 238–243.





## REFERENCES FOR SUPPLEMENTARY TABLE S2

- Ballard, D.J., Phillips, C., Wright, G., Thacker, C.R., Robson, C., Revoir, A.P., Syndercombe Court, D., 2005. A study of mutation rates and the characterisation of intermediate, null and duplicated alleles for 13 Y chromosome STRs. *Forensic Sci. Int.* 155, 65–70.
- Berger, B., Lindinger, A., Niederstätter, H., Grubwieser, P., Parson, W., 2005. Y-STR typing of an Austrian population sample using a 17-loci multiplex PCR assay. *Int. J. Legal Med.* 119, 241–246.
- Bianchi, N.O., Catanesi, C.I., Bailliet, G., Martinez-Marignac, V.L., Bravi, C.M., Vidal-Rioja, L.B., Herrera, R.J., López-Camelo, J.S., 1998. Characterization of ancestral and derived Y-chromosome haplotypes of New World native populations. *Am. J. Hum. Genet.* 63, 1862–1871.
- Decker, A.E., Kline, M.C., Redman, J.W., Reid, T.M., Butler, J.M., 2008. Analysis of mutations in father–son pairs with 17 Y-STR loci. *Forensic Sci. Int.: Genet.* 2, e31–e35.
- Domingues, P.M., Gusmão, L., da Silva, D.A., Amorim, A., Pereira, R.W., de Carvalho, E.F., 2007. Sub-Saharan Africa descendents in Rio de Janeiro (Brazil): population and mutational data for 12 Y-STR loci. *Int. J. Legal Med.* 121, 238–241.
- Dupuy, B.M., Andreassen, R., Frones, A.G., Tomassen, K., Egeland, T., Brion, M., Carracedo, A., Olaisen, B., 2001. Y-chromosome variation in a Norwegian population sample. *Forensic Sci. Int.* 117, 163–173.
- Dupuy, B.M., Stenersen, M., Egeland, T., Olaisen, B., 2004. Y-chromosomal microsatellite mutation rates: differences in mutation rate between and within loci. *Hum. Mutat.* 23, 117–124.
- Ge, J., Budowle, B., Aranda, X.G., Planz, J.V., Eisenberg, A.J., Chakraborty, R., 2009. Mutation rates at Y chromosome short tandem repeats in Texas populations. *Forensic Sci. Int.: Genet.* 3, 179–184.
- Goedbloed, M., Vermeulen, M., Fang, R., Lembring, M., Wollstein, A., Ballantyne, K., Lao, O., Brauer, S., Krüger, C., Roewer, L., Lessig, R., Ploski, R., Dobosz, T., Henke, L., Henke, J., Furtado, M., Kayser, M., 2009. Comprehensive mutation analysis of 17 Y-chromosomal short tandem repeat polymorphisms included in the AmpFISTR® Yfiler® PCR amplification kit. *Int. J. Legal Med.* 123, 471–482.
- Gusmão, L., Sánchez-Diz, P., Calafell, F., Martín, P., Alonso, C.A., Álvarez-Fernández, F., Alves, C., Borjas-Fajardo, L., Bozzo, W.R., Bravo, M.L., Builes, J.J., Capilla, J., Carvalho, M., Castillo, C., Catanesi, C.I., Corach, D., Lonardo, A.M.D., Espinheira, R., de Carvalho, E.F., Farfán, M.J., Figueiredo, H.P., Gomes, I., Lojo, M.M., Marino, M., Pinheiro, M.F., Pontes, M.L., Prieto, V., Ramos-Luis, E., Riancho, J.A., Góes, A.C.S., Santapa, O.A., Sumita, D.R., Vallejo, G., Rioja, L.V., Vide, M.C., da Silva, C.I.V., Whittle, M.R., Zabala, W., Zarrabeitia, M.T., Alonso, A., Carracedo, A., Amorim, A., 2005. Mutation rates at Y chromosome specific microsatellites. *Hum. Mutat.* 26, 520–528.
- Heyer, E., Puymirat, J., Dieltjes, P., Bakker, E., de Knijff, P., 1997. Estimating Y chromosome specific microsatellite mutation frequencies using deep rooting pedigrees. *Hum. Mol. Genet.* 6, 799–803.
- Hohoff, C., Dewa, K., Sibbing, U., Hoppe, K., Forster, P., Brinkmann, B., 2007. Y-chromosomal microsatellite mutation rates in a population sample from northwestern Germany. *International Journal of Legal Medicine* 121, 359–363.
- Kayser, M., Caglià, A., Corach, D., Fretwell, N., Gehrig, C., Graziosi, G., Heidorn, F., Herrmann, S., Herzog, B., Hidding, M., Honda, K., Jobling, M., Krawczak, M., Leim, K., Meuser, S., Meyer, E., Oesterreich, W., Pandya, A., Parson, W., Penacino, G., Perez-Lezaun, A., Piccinini, A., Prinz, M., Schmitt, C., Schneider, P.M., Szibor, R., Teifel-Greding, J., Weichhold, G., de Knijff, P., Roewer, L.,

1997. Evaluation of Y-chromosomal STRs: a multicenter study. *International Journal of Legal Medicine* 110, 125–133.
- Kayser, M., Roewer, L., Hedman, M., Henke, L., Henke, J., Brauer, S., Krüger, C., Krawczak, M., Nagy, M., Dobosz, T., Szibor, R., de Knijff, P., Stoneking, M., Sajantila, A., 2000. Characteristics and frequency of germline mutations at microsatellite loci from the human Y chromosome, as revealed by direct observation in father/son pairs. *American Journal of Human Genetics* 66, 1580–1588.
- Kim, S.H., Kim, N.Y., Kim, K.S., Kim, J.J., Park, J.T., Chung, K.W., Han, M.S., Kim, W., 2009. Population genetics and mutational events at 6 Y-STRs in Korean population. *Forensic Science International: Genetics* 3, e53–e54.
- Kurihara, R., Yamamoto, T., Uchihi, R., Li, S., Yoshimoto, T., Ohtaki, H., Kamiyama, K., Katsumata, Y., 2004. Mutations in 14 Y-STR loci among Japanese father-son haplotypes. *International Journal of Legal Medicine* 118, 125–131.
- Lee, H.Y., Park, M.J., Chung, U., Lee, H.Y., Yang, W.I., Cho, S., Shin, K., 2007. Haplotypes and mutation analysis of 22 Y-chromosomal STRs in Korean father—son pairs. *Int. J. Legal Med.* 121, 128–135.
- Lessig, R., Edelmann, J., 1998. Y chromosome polymorphisms and haplotypes in West Saxony (Germany). *Int. J. Legal Med.* 111, 215–218.
- Mulero, J.J., Chang, C.W., Calandro, L.M., Green, R.L., Li, Y., Johnson, C.L., Hennessy, L.K., 2006. Development and Validation of the AmpF $\mathbb{L}$ STR $\mathbb{R}$  Yfiler $\mathbb{T}$  PCR Amplification Kit: A Male Specific, Single Amplification 17 Y-STR Multiplex System. *J. For. Sci.* 51, 64–75.
- Pestoni, C., Cal, M.L., Lareu, M.V., Rodríguez-Calvo, M.S., Carracedo, A., 1998. Y chromosome STR haplotypes: genetic and sequencing data of the Galician population (NW Spain). *International Journal of Legal Medicine* 112, 15–21.
- Pontes, M.L., Caine, L., Abrantes, D., Lima, G., Pinheiro, M.F., 2007. Allele frequencies and population data for 17 Y-STR loci (AmpF $\mathbb{L}$ STR $\mathbb{R}$  Y-filer $\mathbb{T}$ ) in a Northern Portuguese population sample. *Forensic Sci. Int.* 170, 62–67.
- Sánchez-Diz, P., Alves, C., Carvalho, E., Carvalho, M., Espinheira, R., García, O., Pinheiro, M., Pontes, L., Porto, M., Santapa, O., Silva, C., Sumita, D., Valente, S., Whittle, M., Yurrebaso, I., Carracedo, A., Amorim, A., Gusmão, L., 2008. Population and segregation data on 17 Y-STRs: results of a GEP-ISFG collaborative study. *International Journal of Legal Medicine* 122, 529–533.
- Shi, M., Tang, J., Bai, R., Yu, X., Lv, J., Hu, B., 2007. Haplotypes of 20 Y-chromosomal STRs in a population sample from southeast China (Chaoshan area). *Int. J. Legal Med.* 121, 455–462.
- de Souza Góes, A.C., de Carvalho, E.F., Gomes, I., da Silva, D.A., Gil, É.H.F., Amorim, A., Gusmão, L., 2005. Population and mutation analysis of 17 Y-STR loci from Rio de Janeiro (Brazil). *Int. J. Legal Med.* 119, 70–76.
- Tamura, A., Iwata, M., Tsuboi, K., Miyazaki, T., Nishio, H., Suzuki, K., 2008. Sequence analysis of two de novo mutation alleles at the Y-STR locus. *Forensic Science International: Genetics Supplement Series* 1, 250–251.
- Toscanini, U., Gusmão, L., Berardi, G., Amorim, A., Carracedo, Á., Salas, A., Raimondi, E., 2008. Y chromosome microsatellite genetic variation in two Native American populations from Argentina: Population stratification and mutation data. *Forensic Science International: Genetics* 2, 274–280.

Tsai, L., Yuen, T., Hsieh, H., Lin, M., Tzeng, C., Huang, N., Linacre, A., Lee, J.C., 2002. Haplotype frequencies of nine Y-chromosome STR loci in the Taiwanese Han population. *International Journal of Legal Medicine* 116, 179–183.

Turrina, S., Atzei, R., De Leo, D., 2006. Y-chromosomal STR haplotypes in a Northeast Italian population sample using 17plex loci PCR assay. *International Journal of Legal Medicine* 120, 56–59.

Vermeulen, M., Wollstein, A., van der Gaag, K., Lao, O., Xue, Y., Wang, Q., Roewer, L., Knoblauch, H., Tyler-Smith, C., de Knijff, P., Kayser, M., 2009. Improving global and regional resolution of male lineage differentiation by simple single-copy Y-chromosomal short tandem repeat polymorphisms. *Forensic Sci. Int.: Genet.* 3, 205–213.
