# Supplementary material
Source: PubMed Central journal article supplement (PMC3039515)
Supplement: ejhg2010154x3.pdf [file ejhg2010154x3.pdf]

**Table 1.** Mutation rate estimates (measured in mutations per generation), obtained from combined meiosis data from 29 published studies (listed in supplementary table S2) and predicted from the logistic model, for 110 Y-STR loci.

| Locus                  | Mutations in meiosis | Meiosis | $\hat{\mu}_{meiosis}$  | 95% CI                                           | Motif size <sup>1</sup> | Repeat structure <sup>1</sup> | $\hat{R}_H$ <sup>1</sup> | $\hat{\mu}_{regression}$ | 95% CI                                          |
|------------------------|----------------------|---------|------------------------|--------------------------------------------------|-------------------------|-------------------------------|--------------------------|--------------------------|-------------------------------------------------|
| DYS388 <sup>2,3</sup>  | 1                    | 2394    | $4.177 \times 10^{-4}$ | $(2.143 \times 10^{-5} - 2.362 \times 10^{-3})$  | tri                     | simple                        | 0.218                    | $4.587 \times 10^{-4}$   | $(2.496 \times 10^{-4} - 8.430 \times 10^{-4})$ |
| DYS426                 |                      |         |                        |                                                  | tri                     | simple                        | 0.214                    | $4.579 \times 10^{-4}$   | $(2.491 \times 10^{-4} - 8.416 \times 10^{-4})$ |
| DYS436 <sup>2</sup>    |                      |         |                        |                                                  | tri                     | simple                        | 0.146                    | $4.414 \times 10^{-4}$   | $(2.394 \times 10^{-4} - 8.139 \times 10^{-4})$ |
| DYS472                 | 0                    | 403     | 0                      | $(0 - 9.442 \times 10^{-3})$                     | tri                     | simple                        | 0.006                    | $4.094 \times 10^{-4}$   | $(2.204 \times 10^{-4} - 7.601 \times 10^{-4})$ |
| DYS476                 | 0                    | 403     | 0                      | $(0 - 9.442 \times 10^{-3})$                     | tri                     | simple                        | 0.051                    | $4.193 \times 10^{-4}$   | $(2.263 \times 10^{-4} - 7.768 \times 10^{-4})$ |
| DYS480                 | 0                    | 403     | 0                      | $(0 - 9.442 \times 10^{-3})$                     | tri                     | simple                        | 0.022                    | $4.129 \times 10^{-4}$   | $(2.225 \times 10^{-4} - 7.661 \times 10^{-4})$ |
| DYS481                 | 3                    | 403     | $7.444 \times 10^{-3}$ | $(2.535 \times 10^{-3} - 2.166 \times 10^{-2})$  | tri                     | simple                        | 5.272                    | $6.937 \times 10^{-3}$   | $(3.163 \times 10^{-3} - 1.514 \times 10^{-2})$ |
| DYS485                 | 1                    | 403     | $2.481 \times 10^{-3}$ | $(1.273 \times 10^{-4} - 1.392 \times 10^{-2})$  | tri                     | simple                        | 0.585                    | $5.591 \times 10^{-4}$   | $(3.087 \times 10^{-4} - 1.013 \times 10^{-3})$ |
| DYS487                 | 1                    | 403     | $2.481 \times 10^{-3}$ | $(1.273 \times 10^{-4} - 1.392 \times 10^{-2})$  | tri                     | simple                        | 0.210                    | $4.570 \times 10^{-4}$   | $(2.485 \times 10^{-4} - 8.400 \times 10^{-4})$ |
| DYS488                 | 0                    | 403     | 0                      | $(0 - 9.442 \times 10^{-3})$                     | tri                     | simple                        | 0.138                    | $4.394 \times 10^{-4}$   | $(2.382 \times 10^{-4} - 8.105 \times 10^{-4})$ |
| DYS490                 | 0                    | 403     | 0                      | $(0 - 9.442 \times 10^{-3})$                     | tri                     | simple                        | 0.143                    | $4.406 \times 10^{-4}$   | $(2.389 \times 10^{-4} - 8.126 \times 10^{-4})$ |
| DYS491                 | 0                    | 403     | 0                      | $(0 - 9.442 \times 10^{-3})$                     | tri                     | simple                        | 0.083                    | $4.267 \times 10^{-4}$   | $(2.306 \times 10^{-4} - 7.892 \times 10^{-4})$ |
| DYS492                 | 0                    | 403     | 0                      | $(0 - 9.442 \times 10^{-3})$                     | tri                     | simple                        | 0.144                    | $4.410 \times 10^{-4}$   | $(2.391 \times 10^{-4} - 8.132 \times 10^{-4})$ |
| DYS494                 | 0                    | 403     | 0                      | $(0 - 9.442 \times 10^{-3})$                     | tri                     | simple                        | 0.048                    | $4.187 \times 10^{-4}$   | $(2.259 \times 10^{-4} - 7.758 \times 10^{-4})$ |
| DYS495                 | 0                    | 403     | 0                      | $(0 - 9.442 \times 10^{-3})$                     | tri                     | simple                        | 0.586                    | $5.594 \times 10^{-4}$   | $(3.089 \times 10^{-4} - 1.013 \times 10^{-3})$ |
| DYS497                 | 1                    | 403     | $2.481 \times 10^{-3}$ | $(1.273 \times 10^{-4} - 1.392 \times 10^{-2})$  | tri                     | simple                        | 0.183                    | $4.502 \times 10^{-4}$   | $(2.445 \times 10^{-4} - 8.286 \times 10^{-4})$ |
| DYS617                 | 0                    | 403     | 0                      | $(0 - 9.442 \times 10^{-3})$                     | tri                     | simple                        | 0.427                    | $5.135 \times 10^{-4}$   | $(2.819 \times 10^{-4} - 9.353 \times 10^{-4})$ |
| DYS618                 | 0                    | 403     | 0                      | $(0 - 9.442 \times 10^{-3})$                     | tri                     | simple                        | 0.113                    | $4.336 \times 10^{-4}$   | $(2.347 \times 10^{-4} - 8.008 \times 10^{-4})$ |
| DYS392                 | 6                    | 13948   | $4.302 \times 10^{-4}$ | $(1.972 \times 10^{-4} - 9.383 \times 10^{-4})$  | tri                     | complex                       | 0.722                    | $4.755 \times 10^{-4}$   | $(2.628 \times 10^{-4} - 8.603 \times 10^{-4})$ |
| Mean                   |                      |         | $9.257 \times 10^{-4}$ |                                                  |                         |                               |                          | $7.974 \times 10^{-4}$   |                                                 |
| SD                     |                      |         | $1.931 \times 10^{-3}$ |                                                  |                         |                               |                          | $1.487 \times 10^{-3}$   |                                                 |
| DYF406S1               |                      |         |                        |                                                  | tetra                   | simple                        | 1.484                    | $4.728 \times 10^{-3}$   | $(3.874 \times 10^{-3} - 5.771 \times 10^{-3})$ |
| DYS393 (aka DYS395)    | 13                   | 12576   | $1.034 \times 10^{-3}$ | $(6.042 \times 10^{-4} - 1.768 \times 10^{-3})$  | tetra                   | simple                        | 0.368                    | $2.598 \times 10^{-3}$   | $(2.163 \times 10^{-3} - 3.119 \times 10^{-3})$ |
| DYS434 <sup>2,3</sup>  | 0                    | 80      | 0                      | $(0 - 4.582 \times 10^{-2})$                     | tetra                   | simple                        | 0.359                    | $2.584 \times 10^{-3}$   | $(2.151 \times 10^{-3} - 3.105 \times 10^{-3})$ |
| DYS435 <sup>2,3</sup>  | 0                    | 161     | 0                      | $(0 - 2.330 \times 10^{-2})$                     | tetra                   | simple                        | 0.128                    | $2.283 \times 10^{-3}$   | $(1.874 \times 10^{-3} - 2.780 \times 10^{-3})$ |
| DYS441 <sup>2</sup>    |                      |         |                        |                                                  | tetra                   | simple                        | 1.032                    | $3.709 \times 10^{-3}$   | $(3.110 \times 10^{-3} - 4.423 \times 10^{-3})$ |
| DYS445 <sup>2</sup>    |                      |         |                        |                                                  | tetra                   | simple                        | 0.272                    | $2.467 \times 10^{-3}$   | $(2.044 \times 10^{-3} - 2.977 \times 10^{-3})$ |
| DYS453 <sup>2</sup>    |                      |         |                        |                                                  | tetra                   | simple                        | 0.095                    | $2.243 \times 10^{-3}$   | $(1.837 \times 10^{-3} - 2.738 \times 10^{-3})$ |
| DYS454 (aka DYS639)    |                      |         |                        |                                                  | tetra                   | simple                        | 0.044                    | $2.182 \times 10^{-3}$   | $(1.781 \times 10^{-3} - 2.674 \times 10^{-3})$ |
| DYS455 <sup>2</sup>    |                      |         |                        |                                                  | tetra                   | simple                        | 0.008                    | $2.140 \times 10^{-3}$   | $(1.741 \times 10^{-3} - 2.630 \times 10^{-3})$ |
| DYS456                 | 30                   | 6664    | $4.502 \times 10^{-3}$ | $(3.155 \times 10^{-3} - 6.419 \times 10^{-3})$  | tetra                   | simple                        | 0.795                    | $3.266 \times 10^{-3}$   | $(2.748 \times 10^{-3} - 3.881 \times 10^{-3})$ |
| DYS458                 | 46                   | 6684    | $6.882 \times 10^{-3}$ | $(5.164 \times 10^{-3} - 9.167 \times 10^{-3})$  | tetra                   | simple                        | 1.503                    | $4.777 \times 10^{-3}$   | $(3.908 \times 10^{-3} - 5.838 \times 10^{-3})$ |
| DYS460 (aka GATA A7.1) | 5                    | 1308    | $3.823 \times 10^{-3}$ | $(1.634 \times 10^{-3} - 8.917 \times 10^{-3})$  | tetra                   | simple                        | 0.288                    | $2.488 \times 10^{-3}$   | $(2.064 \times 10^{-3} - 3.000 \times 10^{-3})$ |
| DYS461 (aka GATA A7.2) | 0                    | 922     | 0                      | $(4.319 \times 10^{-19} - 4.149 \times 10^{-3})$ | tetra                   | simple                        | 0.619                    | $2.972 \times 10^{-3}$   | $(2.497 \times 10^{-3} - 3.538 \times 10^{-3})$ |
| DYS462 <sup>2</sup>    |                      |         |                        |                                                  | tetra                   | simple                        | 0.490                    | $2.774 \times 10^{-3}$   | $(2.321 \times 10^{-3} - 3.313 \times 10^{-3})$ |
| DYS505                 | 0                    | 403     | 0                      | $(0 - 9.442 \times 10^{-3})$                     | tetra                   | simple                        | 0.629                    | $2.988 \times 10^{-3}$   | $(2.511 \times 10^{-3} - 3.557 \times 10^{-3})$ |
| DYS508                 | 2                    | 403     | $4.963 \times 10^{-3}$ | $(1.362 \times 10^{-3} - 1.791 \times 10^{-2})$  | tetra                   | simple                        | 0.641                    | $3.007 \times 10^{-3}$   | $(2.527 \times 10^{-3} - 3.579 \times 10^{-3})$ |
| DYS511                 | 1                    | 403     | $2.481 \times 10^{-3}$ | $(1.273 \times 10^{-4} - 1.392 \times 10^{-2})$  | tetra                   | simple                        | 0.210                    | $2.386 \times 10^{-3}$   | $(1.969 \times 10^{-3} - 2.890 \times 10^{-3})$ |
| DYS522                 | 0                    | 555     | 0                      | $(0 - 6.874 \times 10^{-3})$                     | tetra                   | simple                        | 0.485                    | $2.766 \times 10^{-3}$   | $(2.314 \times 10^{-3} - 3.305 \times 10^{-3})$ |
| DYS525                 | 0                    | 403     | 0                      | $(0 - 9.442 \times 10^{-3})$                     | tetra                   | simple                        | 0.187                    | $2.356 \times 10^{-3}$   | $(1.942 \times 10^{-3} - 2.858 \times 10^{-3})$ |
| DYS530                 | 0                    | 403     | 0                      | $(0 - 9.442 \times 10^{-3})$                     | tetra                   | simple                        | 0.016                    | $2.150 \times 10^{-3}$   | $(1.750 \times 10^{-3} - 2.640 \times 10^{-3})$ |
| DYS531                 | 0                    | 483     | 0                      | $(0 - 7.891 \times 10^{-3})$                     | tetra                   | simple                        | 0.143                    | $2.301 \times 10^{-3}$   | $(1.891 \times 10^{-3} - 2.800 \times 10^{-3})$ |
| DYS533                 | 2                    | 555     | $3.604 \times 10^{-3}$ | $(9.888 \times 10^{-4} - 1.304 \times 10^{-2})$  | tetra                   | simple                        | 0.350                    | $2.572 \times 10^{-3}$   | $(2.140 \times 10^{-3} - 3.091 \times 10^{-3})$ |
| DYS537                 | 0                    | 403     | 0                      | $(0 - 9.442 \times 10^{-3})$                     | tetra                   | simple                        | 0.124                    | $2.278 \times 10^{-3}$   | $(1.869 \times 10^{-3} - 2.775 \times 10^{-3})$ |
| DYS540                 | 0                    | 403     | 0                      | $(0 - 9.442 \times 10^{-3})$                     | tetra                   | simple                        | 0.153                    | $2.314 \times 10^{-3}$   | $(1.903 \times 10^{-3} - 2.813 \times 10^{-3})$ |

|                                          |    |       |                        |                                                 |              |                |              |                                          |                                                                   |
|------------------------------------------|----|-------|------------------------|-------------------------------------------------|--------------|----------------|--------------|------------------------------------------|-------------------------------------------------------------------|
| DYS549                                   | 1  | 555   | $1.802 \times 10^{-3}$ | $(9.24 \times 10^{-5} - 1.013 \times 10^{-2})$  | tetra        | simple         | 0.275        | $2.471 \times 10^{-3}$                   | $(2.047 \times 10^{-3} - 2.981 \times 10^{-3})$                   |
| DYS554                                   | 1  | 403   | $2.481 \times 10^{-3}$ | $(1.273 \times 10^{-4} - 1.392 \times 10^{-2})$ | tetra        | simple         | 0.038        | $2.175 \times 10^{-3}$                   | $(1.774 \times 10^{-3} - 2.667 \times 10^{-3})$                   |
| DYS556                                   | 0  | 403   | 0                      | $(0 - 9.442 \times 10^{-3})$                    | tetra        | simple         | 0.301        | $2.505 \times 10^{-3}$                   | $(2.079 \times 10^{-3} - 3.018 \times 10^{-3})$                   |
| DYS565                                   | 2  | 403   | $4.963 \times 10^{-3}$ | $(1.362 \times 10^{-3} - 1.791 \times 10^{-2})$ | tetra        | simple         | 0.233        | $2.415 \times 10^{-3}$                   | $(1.996 \times 10^{-3} - 2.921 \times 10^{-3})$                   |
| DYS567                                   | 0  | 403   | 0                      | $(0 - 9.442 \times 10^{-3})$                    | tetra        | simple         | 0.164        | $2.328 \times 10^{-3}$                   | $(1.916 \times 10^{-3} - 2.828 \times 10^{-3})$                   |
| DYS568                                   | 0  | 403   | 0                      | $(0 - 9.442 \times 10^{-3})$                    | tetra        | simple         | 0.142        | $2.300 \times 10^{-3}$                   | $(1.890 \times 10^{-3} - 2.798 \times 10^{-3})$                   |
| DYS569                                   | 0  | 403   | 0                      | $(0 - 9.442 \times 10^{-3})$                    | tetra        | simple         | 0.017        | $2.150 \times 10^{-3}$                   | $(1.751 \times 10^{-3} - 2.641 \times 10^{-3})$                   |
| DYS570                                   | 7  | 555   | $1.261 \times 10^{-2}$ | $(6.123 \times 10^{-3} - 2.580 \times 10^{-2})$ | tetra        | simple         | 1.264        | $4.203 \times 10^{-3}$                   | $(3.491 \times 10^{-3} - 5.059 \times 10^{-3})$                   |
| DYS572                                   | 1  | 403   | $2.481 \times 10^{-3}$ | $(1.273 \times 10^{-4} - 1.392 \times 10^{-2})$ | tetra        | simple         | 0.236        | $2.419 \times 10^{-3}$                   | $(2.000 \times 10^{-3} - 2.926 \times 10^{-3})$                   |
| DYS573                                   | 2  | 403   | $4.963 \times 10^{-3}$ | $(1.362 \times 10^{-3} - 1.791 \times 10^{-2})$ | tetra        | simple         | 0.208        | $2.383 \times 10^{-3}$                   | $(1.967 \times 10^{-3} - 2.887 \times 10^{-3})$                   |
| DYS575                                   | 1  | 403   | $2.481 \times 10^{-3}$ | $(1.273 \times 10^{-4} - 1.392 \times 10^{-2})$ | tetra        | simple         | 0.027        | $2.162 \times 10^{-3}$                   | $(1.762 \times 10^{-3} - 2.653 \times 10^{-3})$                   |
| DYS576                                   | 9  | 555   | $1.622 \times 10^{-2}$ | $(8.554 \times 10^{-3} - 3.053 \times 10^{-2})$ | tetra        | simple         | 1.256        | $4.184 \times 10^{-3}$                   | $(3.477 \times 10^{-3} - 5.034 \times 10^{-3})$                   |
| DYS578                                   | 0  | 403   | 0                      | $(0 - 9.442 \times 10^{-3})$                    | tetra        | simple         | 0.333        | $2.548 \times 10^{-3}$                   | $(2.118 \times 10^{-3} - 3.065 \times 10^{-3})$                   |
| DYS579                                   | 0  | 403   | 0                      | $(0 - 9.442 \times 10^{-3})$                    | tetra        | simple         | 0.004        | $2.136 \times 10^{-3}$                   | $(1.737 \times 10^{-3} - 2.625 \times 10^{-3})$                   |
| DYS580                                   | 0  | 403   | 0                      | $(0 - 9.442 \times 10^{-3})$                    | tetra        | simple         | 0.009        | $2.141 \times 10^{-3}$                   | $(1.742 \times 10^{-3} - 2.631 \times 10^{-3})$                   |
| DYS583                                   | 0  | 403   | 0                      | $(0 - 9.442 \times 10^{-3})$                    | tetra        | simple         | 0.023        | $2.158 \times 10^{-3}$                   | $(1.758 \times 10^{-3} - 2.648 \times 10^{-3})$                   |
| DYS636                                   | 1  | 403   | $2.481 \times 10^{-3}$ | $(1.273 \times 10^{-4} - 1.392 \times 10^{-2})$ | tetra        | simple         | 0.149        | $2.309 \times 10^{-3}$                   | $(1.899 \times 10^{-3} - 2.808 \times 10^{-3})$                   |
| DYS638                                   | 1  | 403   | $2.481 \times 10^{-3}$ | $(1.273 \times 10^{-4} - 1.392 \times 10^{-2})$ | tetra        | simple         | 0.097        | $2.245 \times 10^{-3}$                   | $(1.839 \times 10^{-3} - 2.740 \times 10^{-3})$                   |
| DYS640                                   | 2  | 403   | $4.963 \times 10^{-3}$ | $(1.362 \times 10^{-3} - 1.791 \times 10^{-2})$ | tetra        | simple         | 0.060        | $2.201 \times 10^{-3}$                   | $(1.798 \times 10^{-3} - 2.694 \times 10^{-3})$                   |
| DYS641                                   | 0  | 403   | 0                      | $(0 - 9.442 \times 10^{-3})$                    | tetra        | simple         | 0.043        | $2.181 \times 10^{-3}$                   | $(1.780 \times 10^{-3} - 2.673 \times 10^{-3})$                   |
| DYS19 (aka DYS394)                       | 32 | 14632 | $2.187 \times 10^{-3}$ | $(1.550 \times 10^{-3} - 3.086 \times 10^{-3})$ | tetra        | complex        | 0.970        | $2.836 \times 10^{-3}$                   | $(2.528 \times 10^{-3} - 3.182 \times 10^{-3})$                   |
| DYS389I                                  | 32 | 12651 | $2.529 \times 10^{-3}$ | $(1.792 \times 10^{-3} - 3.569 \times 10^{-3})$ | tetra        | complex        | 0.494        | $2.196 \times 10^{-3}$                   | $(1.916 \times 10^{-3} - 2.517 \times 10^{-3})$                   |
| DYS389B                                  | 40 | 12622 | $3.169 \times 10^{-3}$ | $(2.328 \times 10^{-3} - 4.312 \times 10^{-3})$ | tetra        | complex        | 0.767        | $2.543 \times 10^{-3}$                   | $(2.255 \times 10^{-3} - 2.867 \times 10^{-3})$                   |
| DYS390                                   | 30 | 14131 | $2.123 \times 10^{-3}$ | $(1.488 \times 10^{-3} - 3.029 \times 10^{-3})$ | tetra        | complex        | 1.895        | $4.661 \times 10^{-3}$                   | $(3.923 \times 10^{-3} - 5.536 \times 10^{-3})$                   |
| DYS391                                   | 38 | 13995 | $2.715 \times 10^{-3}$ | $(1.979 \times 10^{-3} - 3.724 \times 10^{-3})$ | tetra        | complex        | 0.335        | $2.016 \times 10^{-3}$                   | $(1.735 \times 10^{-3} - 2.343 \times 10^{-3})$                   |
| DYS437 (aka DYS457)                      | 10 | 9238  | $1.082 \times 10^{-3}$ | $(5.881 \times 10^{-4} - 1.992 \times 10^{-3})$ | tetra        | complex        | 0.604        | $2.330 \times 10^{-3}$                   | $(2.048 \times 10^{-3} - 2.649 \times 10^{-3})$                   |
| DYS439 (aka GATA A4)                     | 51 | 9313  | $5.476 \times 10^{-3}$ | $(4.168 \times 10^{-3} - 7.192 \times 10^{-3})$ | tetra        | complex        | 1.008        | $2.895 \times 10^{-3}$                   | $(2.580 \times 10^{-3} - 3.248 \times 10^{-3})$                   |
| <i>DYS442<sup>2</sup></i>                |    |       |                        |                                                 | <i>tetra</i> | <i>complex</i> | <i>0.250</i> | <i><math>1.926 \times 10^{-3}</math></i> | <i><math>(1.644 \times 10^{-3} - 2.256 \times 10^{-3})</math></i> |
| <i>DYS443<sup>2,3</sup></i>              | 0  | 80    | 0                      | $(0 - 4.582 \times 10^{-2})$                    | <i>tetra</i> | <i>complex</i> | <i>0.644</i> | <i><math>2.381 \times 10^{-3}</math></i> | <i><math>(2.098 \times 10^{-3} - 2.701 \times 10^{-3})</math></i> |
| DYS444                                   | 0  | 80    | 0                      | $(0 - 4.582 \times 10^{-2})$                    | tetra        | complex        | 0.323        | $2.003 \times 10^{-3}$                   | $(1.722 \times 10^{-3} - 2.330 \times 10^{-3})$                   |
| DYS449                                   | 7  | 369   | $1.897 \times 10^{-2}$ | $(9.219 \times 10^{-3} - 3.863 \times 10^{-2})$ | tetra        | complex        | 3.254        | $9.642 \times 10^{-3}$                   | $(6.849 \times 10^{-3} - 1.356 \times 10^{-2})$                   |
| DYS504                                   |    |       |                        |                                                 | tetra        | complex        | 3.183        | $9.284 \times 10^{-3}$                   | $(6.658 \times 10^{-3} - 1.293 \times 10^{-2})$                   |
| <i>DYS510<sup>2</sup></i>                |    |       |                        |                                                 | <i>tetra</i> | <i>complex</i> | <i>0.664</i> | <i><math>2.407 \times 10^{-3}</math></i> | <i><math>(2.124 \times 10^{-3} - 2.727 \times 10^{-3})</math></i> |
| <i>DYS513<sup>2</sup></i>                |    |       |                        |                                                 | <i>tetra</i> | <i>complex</i> | <i>0.560</i> | <i><math>2.275 \times 10^{-3}</math></i> | <i><math>(1.995 \times 10^{-3} - 2.596 \times 10^{-3})</math></i> |
| DYS520                                   | 0  | 80    | 0                      | $(0 - 4.582 \times 10^{-2})$                    | tetra        | complex        | 0.594        | $2.318 \times 10^{-3}$                   | $(2.037 \times 10^{-3} - 2.638 \times 10^{-3})$                   |
| DYS532                                   |    |       |                        |                                                 | tetra        | complex        | 1.687        | $4.167 \times 10^{-3}$                   | $(3.582 \times 10^{-3} - 4.847 \times 10^{-3})$                   |
| DYS534                                   |    |       |                        |                                                 | tetra        | complex        | 0.979        | $2.851 \times 10^{-3}$                   | $(2.541 \times 10^{-3} - 3.199 \times 10^{-3})$                   |
| <i>DYS544<sup>2</sup></i>                |    |       |                        |                                                 | <i>tetra</i> | <i>complex</i> | <i>0.038</i> | <i><math>1.719 \times 10^{-3}</math></i> | <i><math>(1.435 \times 10^{-3} - 2.059 \times 10^{-3})</math></i> |
| <i>DYS552<sup>2</sup></i>                |    |       |                        |                                                 | <i>tetra</i> | <i>complex</i> | <i>0.971</i> | <i><math>2.838 \times 10^{-3}</math></i> | <i><math>(2.529 \times 10^{-3} - 3.184 \times 10^{-3})</math></i> |
| DYS557                                   | 0  | 80    | 0                      | $(0 - 4.582 \times 10^{-2})$                    | tetra        | complex        | 1.260        | $3.315 \times 10^{-3}$                   | $(2.937 \times 10^{-3} - 3.740 \times 10^{-3})$                   |
| <i>DYS561<sup>2</sup></i>                |    |       |                        |                                                 | <i>tetra</i> | <i>complex</i> | <i>0.151</i> | <i><math>1.827 \times 10^{-3}</math></i> | <i><math>(1.544 \times 10^{-3} - 2.162 \times 10^{-3})</math></i> |
| DYS607                                   |    |       |                        |                                                 | tetra        | complex        | 1.481        | $3.733 \times 10^{-3}$                   | $(3.265 \times 10^{-3} - 4.268 \times 10^{-3})$                   |
| <i>DYS622<sup>2,3</sup></i>              | 0  | 80    | 0                      | $(0 - 4.582 \times 10^{-2})$                    | <i>tetra</i> | <i>complex</i> | <i>0.917</i> | <i><math>2.757 \times 10^{-3}</math></i> | <i><math>(2.456 \times 10^{-3} - 3.095 \times 10^{-3})</math></i> |
| <i>DYS630<sup>2,3</sup></i>              | 0  | 80    | 0                      | $(0 - 4.582 \times 10^{-2})$                    | <i>tetra</i> | <i>complex</i> | <i>1.174</i> | <i><math>3.166 \times 10^{-3}</math></i> | <i><math>(2.814 \times 10^{-3} - 3.561 \times 10^{-3})</math></i> |
| DYS634                                   |    |       |                        |                                                 | tetra        | complex        | 0.241        | $1.917 \times 10^{-3}$                   | $(1.635 \times 10^{-3} - 2.247 \times 10^{-3})$                   |
| DYS635 (aka GATA C4)                     | 23 | 7434  | $3.094 \times 10^{-3}$ | $(2.063 \times 10^{-3} - 4.638 \times 10^{-3})$ | tetra        | complex        | 0.967        | $2.832 \times 10^{-3}$                   | $(2.524 \times 10^{-3} - 3.178 \times 10^{-3})$                   |
| <i>DYS709 (aka DYS516)<sup>2,3</sup></i> | 0  | 80    | 0                      | $(0 - 4.582 \times 10^{-2})$                    | <i>tetra</i> | <i>complex</i> | <i>0.651</i> | <i><math>2.390 \times 10^{-3}</math></i> | <i><math>(2.108 \times 10^{-3} - 2.711 \times 10^{-3})</math></i> |
| <i>GATA A10<sup>2,3</sup></i>            | 5  | 1145  | $4.367 \times 10^{-3}$ | $(1.867 \times 10^{-3} - 1.018 \times 10^{-2})$ | <i>tetra</i> | <i>complex</i> | <i>1.011</i> | <i><math>2.899 \times 10^{-3}</math></i> | <i><math>(2.584 \times 10^{-3} - 3.253 \times 10^{-3})</math></i> |
| GATA H4                                  | 21 | 7618  | $2.757 \times 10^{-3}$ | $(1.804 \times 10^{-3} - 4.211 \times 10^{-3})$ | tetra        | complex        | 0.492        | $2.194 \times 10^{-3}$                   | $(1.913 \times 10^{-3} - 2.515 \times 10^{-3})$                   |
| Mean                                     |    |       | $2.431 \times 10^{-3}$ |                                                 |              |                |              | $2.826 \times 10^{-3}$                   |                                                                   |
| SD                                       |    |       | $3.831 \times 10^{-3}$ |                                                 |              |                |              | $1.309 \times 10^{-3}$                   |                                                                   |
| DYS438                                   | 4  | 9339  | $4.283 \times 10^{-4}$ | $(1.666 \times 10^{-4} - 1.101 \times 10^{-3})$ | penta        | simple         | 1.052        | $7.527 \times 10^{-4}$                   | $(3.916 \times 10^{-4} - 1.446 \times 10^{-3})$                   |
| DYS446                                   | 2  | 658   | $3.040 \times 10^{-3}$ | $(8.339 \times 10^{-4} - 1.101 \times 10^{-2})$ | penta        | simple         | 0.857        | $6.776 \times 10^{-4}$                   | $(3.525 \times 10^{-4} - 1.302 \times 10^{-3})$                   |
| DYS450                                   |    |       |                        |                                                 | penta        | simple         | 0.176        | $4.696 \times 10^{-4}$                   | $(2.417 \times 10^{-4} - 9.123 \times 10^{-4})$                   |

|                           |          |            |                        |                                                   |              |                |              |                              |                                                        |
|---------------------------|----------|------------|------------------------|---------------------------------------------------|--------------|----------------|--------------|------------------------------|--------------------------------------------------------|
| DYS589                    | 0        | 403        | 0                      | (0–9.442×10 <sup>-3</sup> )                       | penta        | simple         | 0.706        | 6.248×10 <sup>-4</sup>       | (3.246×10 <sup>-4</sup> - 1.202×10 <sup>-3</sup> )     |
| DYS590                    | 0        | 403        | 0                      | (0–9.442×10 <sup>-3</sup> )                       | penta        | simple         | 0.023        | 4.325×10 <sup>-4</sup>       | (2.216×10 <sup>-4</sup> - 8.438×10 <sup>-4</sup> )     |
| DYS594                    | 0        | 403        | 0                      | (0–9.442×10 <sup>-3</sup> )                       | penta        | simple         | 0.323        | 5.083×10 <sup>-4</sup>       | (2.625×10 <sup>-4</sup> - 9.840×10 <sup>-4</sup> )     |
| <b>DYS643<sup>4</sup></b> | <b>0</b> | <b>555</b> | <b>0</b>               | <b>(0–6.874×10<sup>-3</sup>)</b>                  | <b>penta</b> | <b>simple</b>  | <b>1.000</b> | <b>7.320×10<sup>-4</sup></b> | <b>(3.809×10<sup>-4</sup> - 1.406×10<sup>-3</sup>)</b> |
| YPENTA1                   |          |            |                        |                                                   | penta        | simple         | 0.517        | 5.645×10 <sup>-4</sup>       | (2.926×10 <sup>-4</sup> - 1.089×10 <sup>-3</sup> )     |
| DYS447                    | 3        | 658        | 4.559×10 <sup>-3</sup> | (1.552×10 <sup>-3</sup> –1.332×10 <sup>-3</sup> ) | penta        | complex        | 1.462        | 7.414×10 <sup>-4</sup>       | (3.746×10 <sup>-4</sup> - 1.467×10 <sup>-3</sup> )     |
| <i>DYS452<sup>2</sup></i> |          |            |                        |                                                   | <i>penta</i> | <i>complex</i> | <i>0.412</i> | <i>4.213×10<sup>-4</sup></i> | <i>(2.110×10<sup>-4</sup> - 8.413×10<sup>-4</sup>)</i> |
| DYS463                    |          |            |                        |                                                   | penta        | complex        | 1.307        | 6.822×10 <sup>-4</sup>       | (3.450×10 <sup>-4</sup> - 1.349×10 <sup>-3</sup> )     |
| <i>DYS587<sup>2</sup></i> |          |            |                        |                                                   | <i>penta</i> | <i>complex</i> | <i>0.743</i> | <i>5.036×10<sup>-4</sup></i> | <i>(2.538×10<sup>-4</sup> - 9.991×10<sup>-4</sup>)</i> |
| DYS588                    |          |            |                        |                                                   | penta        | complex        | 0.414        | 4.217×10 <sup>-4</sup>       | (2.112×10 <sup>-4</sup> - 8.421×10 <sup>-4</sup> )     |
| <i>DYS593<sup>2</sup></i> |          |            |                        |                                                   | <i>penta</i> | <i>complex</i> | <i>0.487</i> | <i>4.387×10<sup>-4</sup></i> | <i>(2.201×10<sup>-4</sup> - 8.745×10<sup>-4</sup>)</i> |
| DYS645                    |          |            |                        |                                                   | penta        | complex        | 0.122        | 3.603×10 <sup>-4</sup>       | (1.789×10 <sup>-4</sup> - 7.255×10 <sup>-4</sup> )     |
| YPENTA2                   |          |            |                        |                                                   | penta        | complex        | 0.802        | 5.198×10 <sup>-4</sup>       | (2.622×10 <sup>-4</sup> - 1.030×10 <sup>-3</sup> )     |
| Mean                      |          |            | 1.147×10 <sup>-3</sup> |                                                   |              |                |              | 5.532×10 <sup>-4</sup>       |                                                        |
| SD                        |          |            | 1.871×10 <sup>-3</sup> |                                                   |              |                |              | 1.308×10 <sup>-4</sup>       |                                                        |
| DYS448                    | 11       | 6655       | 1.653×10 <sup>-3</sup> | (9.232×10 <sup>-4</sup> –2.958×10 <sup>-3</sup> ) | hexa         | complex        | 0.852        | 1.653×10 <sup>-3</sup>       | (9.156×10 <sup>-4</sup> - 2.982×10 <sup>-3</sup> )     |
| DYS596                    |          |            |                        |                                                   | hexa         | complex        | 0.639        | 1.474×10 <sup>-3</sup>       | (8.156×10 <sup>-4</sup> - 2.661×10 <sup>-3</sup> )     |
| Mean                      |          |            | na                     |                                                   |              |                |              | 1.563×10 <sup>-3</sup>       |                                                        |
| SD                        |          |            | na                     |                                                   |              |                |              | 1.268×10 <sup>-4</sup>       |                                                        |

<sup>1</sup> Explanatory variables of the logistic model (supplementary table S3).  $\hat{R}_H$ , population relative mutation rate based on homozygosity.

<sup>2</sup> Loci with estimates obtained from  $\hat{R}'_H$  are marked in italics.

<sup>3</sup> Loci not contributing to the regression because there are no individuals genotyped for them and for the reference locus.

<sup>4</sup> Reference locus is marked in bold.
